# Supplementary material
Source: PubMed Central journal article supplement (PMC9877144)
Supplement: mmc1.pdf [file mmc1.pdf]

**Supplementary Material**

**Inequitable Access to General and Behavioral Healthcare in the US during the COVID-19 Pandemic: A Role for Telehealth?**

Nina Mulia, Yu Ye, Thomas K. Greenfield, Priscilla Martinez, Deidre Patterson, William C. Kerr, Katherine J. Karriker-Jaffe

**Supplemental Table S1.** Total Ns for each group and Ns reporting positive outcomes<sup>1</sup>

| Demographics                                     | (In overall sample)     |     |                                   |     | (Among those with need) <sup>2</sup> |     |                                   |     | (Among those with need) <sup>3</sup> |     |      |     | (Among those receiving care) <sup>4</sup> |     |                      |     |
|--------------------------------------------------|-------------------------|-----|-----------------------------------|-----|--------------------------------------|-----|-----------------------------------|-----|--------------------------------------|-----|------|-----|-------------------------------------------|-----|----------------------|-----|
|                                                  | Perceived Need for Care |     |                                   |     | Received Care                        |     |                                   |     | Delayed care due to:                 |     |      |     | Used telehealth                           |     |                      |     |
|                                                  | General /<br>Check-up   |     | Behavioral<br>Health <sup>5</sup> |     | General /<br>Check-up                |     | Behavioral<br>Health <sup>6</sup> |     | Lockdown/<br>Office Closed/<br>Fear  |     | Cost |     | General /<br>Check-up                     |     | Behavioral<br>Health |     |
|                                                  | N                       | Yes | N                                 | Yes | N                                    | Yes | N                                 | Yes | N                                    | Yes | N    | Yes | N                                         | Yes | N                    | Yes |
| TOTAL                                            | 1793                    | 968 | 1792                              | 347 | 965                                  | 864 | 346                               | 238 | 1055                                 | 406 | 1055 | 115 | 919                                       | 505 | 255                  | 221 |
| Age                                              |                         |     |                                   |     |                                      |     |                                   |     |                                      |     |      |     |                                           |     |                      |     |
| 18-34                                            | 565                     | 274 | 565                               | 155 | 274                                  | 232 | 155                               | 105 | 322                                  | 133 | 322  | 63  | 260                                       | 147 | 108                  | 91  |
| 35-49                                            | 518                     | 278 | 518                               | 112 | 277                                  | 248 | 111                               | 76  | 305                                  | 122 | 305  | 30  | 264                                       | 153 | 81                   | 72  |
| 50+                                              | 710                     | 416 | 709                               | 80  | 414                                  | 384 | 80                                | 57  | 428                                  | 151 | 428  | 22  | 395                                       | 205 | 66                   | 58  |
| Gender                                           |                         |     |                                   |     |                                      |     |                                   |     |                                      |     |      |     |                                           |     |                      |     |
| Female                                           | 1164                    | 664 | 1163                              | 254 | 662                                  | 596 | 253                               | 179 | 719                                  | 289 | 719  | 72  | 633                                       | 374 | 187                  | 165 |
| Male                                             | 628                     | 303 | 628                               | 93  | 302                                  | 267 | 93                                | 59  | 335                                  | 116 | 335  | 43  | 285                                       | 130 | 68                   | 56  |
| Race                                             |                         |     |                                   |     |                                      |     |                                   |     |                                      |     |      |     |                                           |     |                      |     |
| White                                            | 1092                    | 635 | 1092                              | 219 | 634                                  | 578 | 219                               | 157 | 687                                  | 258 | 687  | 62  | 609                                       | 320 | 168                  | 141 |
| Black/Afr Am                                     | 302                     | 141 | 301                               | 56  | 140                                  | 127 | 56                                | 42  | 153                                  | 54  | 153  | 20  | 135                                       | 77  | 43                   | 37  |
| Hispanic/Latinx                                  | 223                     | 94  | 223                               | 41  | 94                                   | 74  | 41                                | 23  | 108                                  | 42  | 108  | 17  | 84                                        | 53  | 27                   | 26  |
| Other groups                                     | 176                     | 98  | 176                               | 31  | 97                                   | 85  | 30                                | 16  | 107                                  | 52  | 107  | 16  | 91                                        | 55  | 17                   | 17  |
| Insurance Type, T1                               |                         |     |                                   |     |                                      |     |                                   |     |                                      |     |      |     |                                           |     |                      |     |
| Private/Other                                    | 1184                    | 669 | 1183                              | 227 | 667                                  | 609 | 227                               | 161 | 724                                  | 271 | 724  | 72  | 642                                       | 342 | 172                  | 148 |
| Public                                           | 463                     | 243 | 463                               | 93  | 242                                  | 214 | 92                                | 63  | 268                                  | 106 | 268  | 17  | 233                                       | 140 | 69                   | 61  |
| Uninsured                                        | 143                     | 55  | 143                               | 27  | 55                                   | 40  | 27                                | 14  | 62                                   | 29  | 62   | 26  | 43                                        | 23  | 14                   | 12  |
| Household Income as<br>% of FPL, <sup>7</sup> T1 |                         |     |                                   |     |                                      |     |                                   |     |                                      |     |      |     |                                           |     |                      |     |
| ≤138% FPL                                        | 307                     | 142 | 307                               | 82  | 141                                  | 119 | 81                                | 48  | 163                                  | 79  | 163  | 25  | 133                                       | 81  | 49                   | 45  |
| 139-400% FPL                                     | 826                     | 447 | 826                               | 160 | 447                                  | 398 | 160                               | 109 | 486                                  | 176 | 486  | 71  | 424                                       | 237 | 117                  | 94  |

|                                  |      |     |      |     |     |     |     |     |     |     |     |    |     |     |     |     |
|----------------------------------|------|-----|------|-----|-----|-----|-----|-----|-----|-----|-----|----|-----|-----|-----|-----|
| >400% FPL                        | 635  | 363 | 634  | 102 | 361 | 332 | 102 | 79  | 390 | 143 | 390 | 18 | 347 | 177 | 87  | 80  |
| Self-rated Health, T1            |      |     |      |     |     |     |     |     |     |     |     |    |     |     |     |     |
| Fair/poor                        | 221  | 136 | 220  | 62  | 135 | 117 | 62  | 38  | 149 | 66  | 149 | 27 | 128 | 88  | 41  | 32  |
| Good/excellent                   | 1571 | 832 | 1571 | 285 | 830 | 747 | 284 | 200 | 906 | 340 | 906 | 88 | 791 | 417 | 214 | 189 |
| Urbanicity, T1                   |      |     |      |     |     |     |     |     |     |     |     |    |     |     |     |     |
| Urban                            | 1577 | 843 | 1576 | 300 | 841 | 757 | 299 | 209 | 915 | 350 | 915 | 90 | 801 | 440 | 225 | 200 |
| Rural                            | 214  | 124 | 214  | 46  | 123 | 106 | 46  | 29  | 138 | 55  | 138 | 25 | 117 | 64  | 30  | 21  |
| Work/pay reduced                 |      |     |      |     |     |     |     |     |     |     |     |    |     |     |     |     |
| Yes                              | 419  | 215 | 419  | 106 | 214 | 191 | 105 | 63  | 241 | 101 | 241 | 51 | 206 | 115 | 66  | 56  |
| No                               | 1372 | 751 | 1371 | 241 | 749 | 671 | 241 | 175 | 812 | 303 | 812 | 64 | 711 | 388 | 189 | 165 |
| Marital & Parenthood status, T1  |      |     |      |     |     |     |     |     |     |     |     |    |     |     |     |     |
| Married/partnered no child       | 571  | 296 | 570  | 80  | 294 | 262 | 80  | 57  | 318 | 124 | 318 | 39 | 277 | 139 | 65  | 53  |
| Married/partnered with child     | 454  | 247 | 454  | 85  | 246 | 223 | 84  | 54  | 277 | 103 | 277 | 26 | 241 | 123 | 56  | 49  |
| Single no child                  | 581  | 323 | 581  | 131 | 323 | 287 | 131 | 93  | 350 | 131 | 350 | 37 | 303 | 182 | 98  | 88  |
| Single with child                | 186  | 101 | 186  | 50  | 101 | 91  | 50  | 33  | 109 | 47  | 109 | 13 | 97  | 60  | 35  | 30  |
| Usual source of primary care, T1 |      |     |      |     |     |     |     |     |     |     |     |    |     |     |     |     |
| Yes                              | 1379 | 806 | 1378 | 265 | 803 | 735 | 264 | 185 | 866 | 322 | 866 | 82 | 775 | 432 | 198 | 174 |
| No                               | 414  | 162 | 414  | 82  | 162 | 129 | 82  | 53  | 189 | 84  | 189 | 33 | 144 | 73  | 57  | 47  |
| Region of residence, T1          |      |     |      |     |     |     |     |     |     |     |     |    |     |     |     |     |
| Northeast                        | 280  | 141 | 280  | 53  | 140 | 129 | 52  | 36  | 155 | 62  | 155 | 8  | 141 | 84  | 40  | 38  |
| Midwest                          | 402  | 230 | 401  | 82  | 229 | 205 | 82  | 63  | 250 | 87  | 250 | 26 | 220 | 111 | 66  | 54  |
| Pacific                          | 243  | 123 | 243  | 50  | 123 | 105 | 50  | 33  | 141 | 73  | 141 | 9  | 115 | 77  | 37  | 35  |
| South                            | 738  | 399 | 738  | 134 | 399 | 361 | 134 | 86  | 430 | 155 | 430 | 65 | 375 | 189 | 90  | 76  |
| Mountain                         | 130  | 75  | 130  | 28  | 74  | 64  | 28  | 20  | 79  | 29  | 79  | 7  | 68  | 44  | 22  | 18  |

<sup>1</sup> Yes indicates the respondent perceived a need for, or received, the specified care.

<sup>2</sup> Receipt of care for general health since April 1, 2020 was examined among those who had perceived need for general healthcare (N=968); Receipt of care for behavioral health since April 1, 2020 was examined among those who had perceived need for behavioral healthcare (N=347).

<sup>3</sup> Reason for delayed care since April 1, 2020 was examined among those who had perceived need for either general or behavioral healthcare (N=1057).

<sup>4</sup> Use of telehealth for general health was examined among those who received any general healthcare since April 1, 2020 (N=919); Use of telehealth for behavioral health was examined among those who received any behavioral healthcare since April 1, 2020 (N=255).

<sup>5</sup> Wanted or needed mental healthcare or counseling, or counseling for drinking.

<sup>6</sup> Received care from a mental health counselor, substance use counselor, or mutual help group such as Alcoholics Anonymous.

<sup>7</sup>FPL, US federal poverty level

T1, the N14 (baseline) survey

**Supplemental Table S2.** Assessing potential bias from sparse data when predicting telehealth use for behavioral health care (N=238): Comparison of adjusted ORs and unadjusted ORs

|                         | Multivariable Logistic Regression<br>(as in Table 2B) |                | Bivariate Logistic Regression<br>(predictors entered separately) |               |
|-------------------------|-------------------------------------------------------|----------------|------------------------------------------------------------------|---------------|
|                         | Adjusted OR                                           | 95% CI         | Unadjusted OR                                                    | 95% CI        |
| Age                     |                                                       |                |                                                                  |               |
| 18-34                   | 0.47                                                  | (0.15, 1.53)   | 0.54                                                             | (0.18, 1.67)  |
| 35-49                   | 1.00                                                  | (0.26, 3.76)   | 1.26                                                             | (0.38, 4.22)  |
| 50+                     | Ref                                                   |                | Ref                                                              |               |
| Gender                  |                                                       |                |                                                                  |               |
| Female                  | 2.10                                                  | (0.78, 5.67)   | 1.74                                                             | (0.65, 4.69)  |
| Male                    | Ref                                                   |                | Ref                                                              |               |
| Race                    |                                                       |                |                                                                  |               |
| White                   | Ref                                                   |                | Ref                                                              |               |
| Black/Afr Am            | 0.36                                                  | (0.11, 1.21)   | 0.41                                                             | (0.10, 1.59)  |
| Hispanic/Latinx         | 11.96*                                                | (1.07, 133.40) | 9.36*                                                            | (1.12, 78.02) |
| Other groups            | NA <sup>1</sup>                                       |                | NA <sup>1</sup>                                                  |               |
| Urbanicity, T1          |                                                       |                |                                                                  |               |
| Urban                   | Ref                                                   |                | Ref                                                              |               |
| Rural                   | 0.30†                                                 | (0.09, 1.01)   | 0.34†                                                            | (0.10, 1.12)  |
| Region of residence, T1 |                                                       |                |                                                                  |               |
| Northeast               | Ref                                                   |                | Ref                                                              |               |
| Midwest                 | 0.21                                                  | (0.03, 1.69)   | 0.16†                                                            | (0.03, 1.07)  |
| Pacific                 | 1.51                                                  | (0.12, 19.59)  | 1.25                                                             | (0.11, 14.55) |
| South                   | 0.25                                                  | (0.03, 1.91)   | 0.14*                                                            | (0.02, 0.95)  |
| Mountain                | 0.26                                                  | (0.02, 3.34)   | 0.32                                                             | (0.04, 2.69)  |

<sup>1</sup> OR estimate for “other” race/ethnicity not available as all 17 respondents in this group reported using telehealth and were dropped from the regression model.

†p<0.10, \*p<0.05

T1, the N14 (baseline) survey



|                                  |         |         |              |         |              |         |              |
|----------------------------------|---------|---------|--------------|---------|--------------|---------|--------------|
| Rural                            |         |         |              |         |              | 3.10**  | (1.57, 6.12) |
| Work/pay reduced                 |         |         |              |         |              |         |              |
| Yes                              |         | 0.73    | (0.38, 1.40) | 1.45†   | (0.96, 2.19) | 2.73**  | (1.43, 5.22) |
| No                               |         | Ref     |              | Ref     |              | Ref     |              |
| Usual source of primary care, T1 | DROPPED | DROPPED |              | DROPPED |              | DROPPED |              |
| Yes                              |         |         |              |         |              |         |              |
| No                               |         |         |              |         |              |         |              |

<sup>1</sup> Each outcome corresponds to a logistic regression model that includes gender, age, race/ethnicity and any other predictor that was found to be at least marginally significant ( $p < 0.10$ ) in Table 1 bivariate analysis; when adjusted ORs are not shown for a given variable, it means the variable was not included in the model (but was used in some other model whose results are presented in this table)

<sup>2</sup> See Footnotes in Supplemental Table S1 for analytic sample Ns.

† $p < 0.10$ , \* $p < 0.05$ , \*\* $p < 0.01$ , \*\*\* $p < 0.001$

FPL, US federal poverty level

T1, the N14 (baseline) survey
